# Supplementary material for: The Moon as Semaphore: Occupancy Modeling Reveals Contrasting Lunar Responses in Elusive Terraranas of a Tropical Montane Forest
Source: Research Square preprint supplement (doi:10.21203/rs.3.rs-8390205/v1), 2025-12-30
Supplement: Supplementary file 1 [file 80e59e5f96a9fad0e5e8a4c7.xlsx]

## Sheet: anuros rio macho
sitio	oc1	oc2	oc3	oc4	oc5	oc6	oc7	oc8	oc9	oc10	area	dap	tree_rich	tree_abu	temp1	temp2	temp3	temp4	temp5	temp6	temp7	temp8	temp9	temp10	hum1	hum2	hum3	hum4	hum5	hum6	hum7	hum8	hum9	hum10	moon1	moon2	moon3	moon4	moon5	moon6	moon7	moon8	moon9	moon10	especie
sitio_01	0	1	1	1	1	1	1	1	0	1	A	12.71	8	15	14	17		19	18	20	18	16	16	16	100	76	100	93	100	90	84	87	89	92	40	40	73	33	67	60	0	100	20	67	diastema
sitio_02	1	1	1	1	1	1	1	1	0	1	A	36.04	13	22	15	18	18	20	17	20	18	19	16	18	100	72	100	93	100	90	93	87	80	92	40	40	73	33	67	60	0	100	20	67	diastema
sitio_03	1	1	1	1	1	1	1	1	0	1	A	68.33	4	7	15	18	18	21	17	23	18	15	16	17	95	73	100	100	100	91	82	86	82	100	40	40	73	33	67	60	0	100	20	67	diastema
sitio_04	0	1	1	1	1	0	1	1	1	1	A	70.28	6	7	16	18	19	22		22	18		17	19	93	86	100	100	84	84	90	87	82	98	40	40	73	33	67	60	0	100	20	67	diastema
sitio_05	1	1	1	1	1	1	0	1	1	1	A	62.45	5	10	16	21	19	22	18	24	18	16	16	20	100	84	100	100	100	93	88	86	86	92	40	40	73	33	67	60	0	100	20	67	diastema
sitio_06	0	0	1	0	1	0	1	1	0	0	A	58.44	7	13	15	24	19	21	19		18	15	17	16	100	75	100	100	100	90	88	86	83	100	40	40	73	33	67	60	0	100	20	67	diastema
sitio_07								0			A	51.13	8	10	15			22	20									100				86			40	40	73	33	67	60	0	100	20	67	diastema
sitio_08	1	0		0	0		1	1	0		B	24.61	8	31	20	26			22	23			18		82	82		88			76	55	75	75	33	27	87	40			6	94	26		diastema
sitio_09	1	0		1	0		1	1	0		B	25.12	6	46	20	25	20	24	22	22			18		86	80		92			74	55	73		33	27	87	40			6	94	26		diastema
sitio_10	1	1		1	0		0	1	0		B	4.59	2	23	18	25		23	20	24		18	16		90	74		100			84	64	81	78	33	27	87	40			6	94	26		diastema
sitio_11	1	0	1	1	0		1	0	0		B	5.93	4	57	20		21								83	80	88	94			74	76	76	65	33	27	87	40			6	94	26		diastema
sitio_12	1	1	1	0	0		1	1	0		B	7.07	5	50	18	21	18	19	19	22		21	17		89	78	78	100			86	93	93	87	33	27	87	40			6	94	26		diastema
sitio_13	1	1	1	1	0		1	1	0		B	8.06	3	37	17	25	19	21	19	20		19	17		80	81	85	100			81	79	79	84	33	27	87	40			6	94	26		diastema
sitio_14	0	1	1	0	0		1		0		B	4.98	6	23	21	23	19	25		21					80	79	89	100			81				33	27	87	40			6	94	26		diastema
sitio_01	0	0	0	0	0	0	0	0	0	0	A	12.71	8	15	14	17		19	18	20	18	16	16	16	100	76	100	93	100	90	84	87	89	92	40	40	73	33	67	60	0	100	20	67	cruentus
sitio_02	0	0	0	0	0	0	0	1	1	0	A	36.04	13	22	15	18	18	20	17	20	18	19	16	18	100	72	100	93	100	90	93	87	80	92	40	40	73	33	67	60	0	100	20	67	cruentus
sitio_03	0	0	0	0	0	0	0	1	0	0	A	68.33	4	7	15	18	18	21	17	23	18	15	16	17	95	73	100	100	100	91	82	86	82	100	40	40	73	33	67	60	0	100	20	67	cruentus
sitio_04	0	0	0	0	0	0	0	0	0	0	A	70.28	6	7	16	18	19	22		22	18		17	19	93	86	100	100	84	84	90	87	82	98	40	40	73	33	67	60	0	100	20	67	cruentus
sitio_05	0	0	1	0	0	0	0	0	0	0	A	62.45	5	10	16	21	19	22	18	24	18	16	16	20	100	84	100	100	100	93	88	86	86	92	40	40	73	33	67	60	0	100	20	67	cruentus
sitio_06	0	0	0	1	1	0	0	1	0	0	A	58.44	7	13	15	24	19	21	19		18	15	17	16	100	75	100	100	100	90	88	86	83	100	40	40	73	33	67	60	0	100	20	67	cruentus
sitio_07	0	0	0	0	1	0	1	1	0	0	A	51.13	8	10	15			22	20									100				86			40	40	73	33	67	60	0	100	20	67	cruentus
sitio_08								0			B	24.61	8	31	20	26			22	23			18		82	82		88			76	55	75	75	33	27	87	40			6	94	26		cruentus
sitio_09	0	0		0	0		0	0	0		B	25.12	6	46	20	25	20	24	22	22			18		86	80		92			74	55	73		33	27	87	40			6	94	26		cruentus
sitio_10	0	0		0	0		0	0	0		B	4.59	2	23	18	25		23	20	24		18	16		90	74		100			84	64	81	78	33	27	87	40			6	94	26		cruentus
sitio_11	0	0		0	0		0	0	0		B	5.93	4	57	20		21								83	80	88	94			74	76	76	65	33	27	87	40			6	94	26		cruentus
sitio_12	0	0	0	0	0		0	0	0		B	7.07	5	50	18	21	18	19	19	22		21	17		89	78	78	100			86	93	93	87	33	27	87	40			6	94	26		cruentus
sitio_13	0	0	0	0	0		0	0	0		B	8.06	3	37	17	25	19	21	19	20		19	17		80	81	85	100			81	79	79	84	33	27	87	40			6	94	26		cruentus
sitio_14	0	0	0	0	0		0	0	0		B	4.98	6	23	21	23	19	25		21					80	79	89	100			81				33	27	87	40			6	94	26		cruentus
sitio_01	1	0	0	0	0	0	0	0	0	0	A	12.71	8	15	14	17		19	18	20	18	16	16	16	100	76	100	93	100	90	84	87	89	92	40	40	73	33	67	60	0	100	20	67	caryophyllaceus
sitio_02	2	0	0	0	0	0	0	0	0	0	A	36.04	13	22	15	18	18	20	17	20	18	19	16	18	100	72	100	93	100	90	93	87	80	92	40	40	73	33	67	60	0	100	20	67	caryophyllaceus
sitio_03	3	0	0	1	0	0	0	0	0	0	A	68.33	4	7	15	18	18	21	17	23	18	15	16	17	95	73	100	100	100	91	82	86	82	100	40	40	73	33	67	60	0	100	20	67	caryophyllaceus
sitio_04	4	0	0	0	1	0	0	0	0	0	A	70.28	6	7	16	18	19	22		22	18		17	19	93	86	100	100	84	84	90	87	82	98	40	40	73	33	67	60	0	100	20	67	caryophyllaceus
sitio_05	5	0	0	0	0	0	0	0	0	0	A	62.45	5	10	16	21	19	22	18	24	18	16	16	20	100	84	100	100	100	93	88	86	86	92	40	40	73	33	67	60	0	100	20	67	caryophyllaceus
sitio_06	6	0	0	1	0	0	0	0	0	0	A	58.44	7	13	15	24	19	21	19		18	15	17	16	100	75	100	100	100	90	88	86	83	100	40	40	73	33	67	60	0	100	20	67	caryophyllaceus
sitio_07	7	0	0	1	0	0	1	0	0	0	A	51.13	8	10	15			22	20									100				86			40	40	73	33	67	60	0	100	20	67	caryophyllaceus
sitio_08	8								0		B	24.61	8	31	20	26			22	23			18		82	82		88			76	55	75	75	33	27	87	40			6	94	26		caryophyllaceus
sitio_09	9	0	0		0	0		0	0	0	B	25.12	6	46	20	25	20	24	22	22			18		86	80		92			74	55	73		33	27	87	40			6	94	26		caryophyllaceus
sitio_10	10	0	0		0	0		0	0	0	B	4.59	2	23	18	25		23	20	24		18	16		90	74		100			84	64	81	78	33	27	87	40			6	94	26		caryophyllaceus
sitio_11	11	0	0		0	0		0	0	0	B	5.93	4	57	20		21								83	80	88	94			74	76	76	65	33	27	87	40			6	94	26		caryophyllaceus
sitio_12	12	0	0	0	0	0		0	0	0	B	7.07	5	50	18	21	18	19	19	22		21	17		89	78	78	100			86	93	93	87	33	27	87	40			6	94	26		caryophyllaceus
sitio_13	13	0	0	0	0	0		0	0	0	B	8.06	3	37	17	25	19	21	19	20		19	17		80	81	85	100			81	79	79	84	33	27	87	40			6	94	26		caryophyllaceus
sitio_14	14	0	0	0	0	0		0	0	0	B	4.98	6	23	21	23	19	25		21					80	79	89	100			81				33	27	87	40			6	94	26		caryophyllaceus
